# Supplementary material for: Synthesis and Preliminary Anticancer Activity Assessment of N-Glycosides of 2-Amino-1,3,4-thiadiazoles
Source: MDPI journal article supplement (doi:10.3390/molecules26237245), 2021-11-29

## Supplementary Data

### **Synthesis and preliminary anticancer activity assessment of N-glycosides of 2-amino-1,3,4-thiadiazoles**

Katarzyna Żurawska<sup>1,2</sup>, Marcin Stokowy<sup>1</sup>, Patryk Kapica<sup>1,2</sup>, Monika Olesiejuk<sup>3</sup>, Agnieszka Kudelko<sup>3</sup>, Katarzyna Papaj<sup>2</sup>, Magdalena Skonieczna<sup>2,4</sup>, Wiesław Szeja<sup>5</sup>, Krzysztof Walczak<sup>1</sup> and Anna Kasprzycka<sup>1,2\*</sup>

<sup>1</sup>Department of Organic Chemistry, Bioorganic Chemistry and Biotechnology, Faculty of Chemistry, Silesian University of Technology, Krzywoustego Street 4, 44-100 Gliwice, Poland.

<sup>2</sup>Centre of Biotechnology, Silesian University of Technology, Krzywoustego Street 8, 44-100 Gliwice, Poland

<sup>3</sup>Department of Chemical Organic Technology and Petrochemistry, The Silesian University of Technology, Krzywoustego Street 4, 44-100 Gliwice, Poland

<sup>4</sup>Department of Systems Biology and Engineering, The Silesian University of Technology, Akademicka Street 16, 44–100 Gliwice, Poland

<sup>5</sup>The Silesian University of Technology, Akademicka Street 16, 44–100 Gliwice, Poland.

\*Correspondence: anna.kasprzycka@polsl.pl (A.K.)

#### **Content:**

|                                                                                                                                                                                                                                                                                                                                                                           |            |
|---------------------------------------------------------------------------------------------------------------------------------------------------------------------------------------------------------------------------------------------------------------------------------------------------------------------------------------------------------------------------|------------|
| <b>General procedure for the synthesis of 2-benzoylhydrazinecarbothioamide derivatives (6)</b>                                                                                                                                                                                                                                                                            | <b>S2</b>  |
| <b>NMR Spectra</b>                                                                                                                                                                                                                                                                                                                                                        | <b>S5</b>  |
| <b>Figure S1.</b> Typical histograms of PI stained DNA content during the cell cycle of MCF-7, HCT116, and HeLa cells, after 72h of incubation with compounds at a dose of 100 µM.                                                                                                                                                                                        | <b>S16</b> |
| <b>Figure S2.</b> Typical dot plots of normal (Annexin-V negative and PI negative stained); early apoptotic (Annexin-V positive and PI negative stained); late apoptotic (Annexin-V positive and PI-positive stained); and necrotic (Annexin-V negative and PI-positive stained) MCF-7, HCT116, and HeLa cells after 72h of incubation with compounds at a dose of 100µM. | <b>S17</b> |

### General procedure for the synthesis of 2-benzoylhydrazinecarbothioamide derivatives (**6**)

A series of 2-amino-1,3,4-thiadiazole derivatives (**2**) were prepared from the commercially available aromatic carboxylic acids (**4**) and thionyl chloride followed by transformation into appropriate acyl thiosemicarbazide **6** in a two-phase solvent system (H<sub>2</sub>O:toluene). Finally cyclization of the intermediate **6** in the concentrated H<sub>2</sub>SO<sub>4</sub> solution at room temperature was carried out.

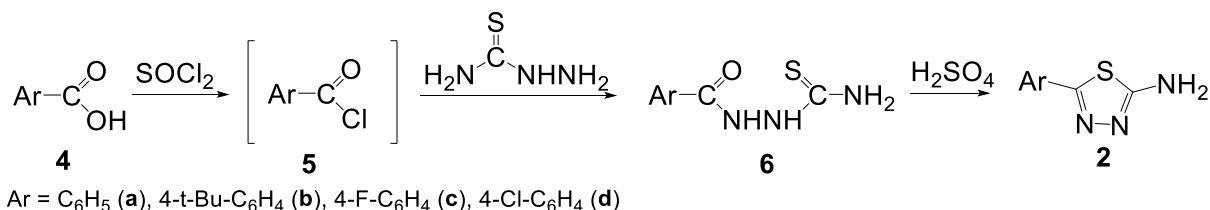

**Scheme 5.** Two-step synthesis of 2-amino-1,3,4-thiadiazole derivatives (**2a-d**).

The appropriate arylcarboxylic acid **4** (0.10 mol) and thionyl chloride SOCl<sub>2</sub> (22 mL, 0.30 mol) were refluxed in an anhydrous toluene (10 mL) until the acid was fully consumed (TLC; 5 - 15h). After cooling, the mixture was concentrated on a rotary evaporator, washed with an additional portion of anhydrous toluene (10 mL) and concentrated again. Then the crude acyl chloride **5** was dissolved in anhydrous toluene (50 mL) and added dropwise to the mixture of thiosemicarbazide (9.11 g, 0.10 mol), NaHCO<sub>3</sub> (8.40 g, 0.10 mol) and H<sub>2</sub>O (150 mL) while stirring. The reaction mixture was stirred for 24 hours. The precipitated solid was filtered off, dried on air and recrystallized from the mixture of EtOH:H<sub>2</sub>O to give pure 2-benzoylhydrazinecarbothioamide derivatives (**6**).

#### 2-(4-*t*-Butylbenzoylhydrazinecarbothioamide (**6a**))

The product was obtained as a beige solid (48% yield, 12.01 g, 0.048 mol); mp 210-211 °C; R<sub>f</sub> (MeOH:CHCl<sub>3</sub>, 1:4 v/v) 0.56. <sup>1</sup>H NMR (400 MHz, DMSO-*d*<sub>6</sub>): δ 10.39 (s, 1H, NH), 9.31 (s, 1H, NH), 7.84 (d, 2H, *J*=6.6 Hz, Ar: H-2, H-6), 7.52-7.60 (m, 2H, NH<sub>2</sub>), 7.48 (d, 2H, *J*=6.6 Hz, Ar: H-3, H-5), 1.33 (s, 9H, C(CH<sub>3</sub>)<sub>3</sub>); <sup>13</sup>C NMR (100 MHz, DMSO-*d*<sub>6</sub>): δ 182.0 (C=S), 165.6 (C=O), 154.6, 128.3, 126.1, 124.9, 34.8, 30.8; IR (ATR) ν: 3269, 3137, 2961, 1682, 1630, 1567, 1525, 1463, 1298, 1266, 1113, 1086, 1015 cm<sup>-1</sup>; HRMS *m/z* calcd for (C<sub>12</sub>H<sub>17</sub>N<sub>3</sub>O<sub>5</sub> + H<sup>+</sup>): 252.1165; found: 252.1169.

#### 2-Benzoylhydrazinecarbothioamide (**6b**)

The product was obtained as a white solid (44% yield, 5.95 g, 0.030 mol); mp 197-198°C (lit.:196-198 °C [25]); R<sub>f</sub> (MeOH:CHCl<sub>3</sub>, 1:4 v/v) 0.54. <sup>1</sup>H NMR (400 MHz, DMSO-*d*<sub>6</sub>): δ 10.37 (s, 1H, NH), 9.32 (s, 1H, NH), 7.90 (d, 2H, *J*=7.2 Hz, Ar: H-2, H-6), 7.90 (d, 2H, *J*=7.2 Hz, Ar: H-2, H-6), 7.85 (br s, 1H, NH), 7.61 (br

s, 1H, NH), 7.56 (t, 1H,  $J=7.2$  Hz, Ar: H-4), 7.45-7.49 (t, 2H,  $J=7.2$  Hz, Ar: H-3, H-5);  $^{13}\text{C}$  NMR (100 MHz, DMSO- $d_6$ ):  $\delta$  182.0 (C=S), 165.8 (C=O), 132.5, 131.7, 128.1, 127.8; IR (ATR)  $\nu$ : 3404, 3254, 3143, 2960, 1686, 1644, 1598, 1579, 1540, 1472, 1262, 1181, 1068, 1000  $\text{cm}^{-1}$

#### *2-(4-Fluorobenzoyl)hydrazinecarbothioamide (6c)*

The product was obtained as a white solid (69% yield, 14.71 g, 0.066 mol); mp 169-171°C (lit.: 172 °C [26]);  $R_f$  (MeOH:CHCl<sub>3</sub>, 1:4 v/v) 0.50.  $^1\text{H}$  NMR (400 MHz, DMSO- $d_6$ ):  $\delta$  10.71 (s, 1H, NH), 9.43 (s, 1H, NH), 8.12 (d, 2H,  $J=8.4$  Hz, Ar: H-2, H-6), 7.94 (br s, 1H, NH), 7.78 (br s, 1H, NH), 7.54 (d, 2H,  $J=8.4$  Hz, Ar: H-3, H-5);  $^{13}\text{C}$  NMR (100 MHz, DMSO- $d_6$ ):  $\delta$  182.0 (C=S), 164.4 (C=O), 164.1, 129.4, 128.1, 116.2; IR (ATR)  $\nu$ : 3503, 3423, 3134, 2977, 1678, 1629, 1601, 1514, 1346, 1257, 1169, 1080, 1037  $\text{cm}^{-1}$ .

#### *2-(4-Chlorobenzoyl)hydrazinecarbothioamide (6d)*

The product was obtained as a white solid (80% yield, 18.38 g, 0.080 mol); mp 217-219 °C (lit.: 218-220 °C [26]);  $R_f$  (MeOH:CHCl<sub>3</sub>, 1:4 v/v) 0.52.  $^1\text{H}$  NMR (400 MHz, DMSO- $d_6$ ):  $\delta$  10.45 (s, 1H, NH), 9.34 (s, 1H, NH), 7.82-7.88 (m, 3H, Ar: H-2, H-6, NH), 7.68-7.72 (m, 3H, Ar: H-3, H-5, NH);  $^{13}\text{C}$  NMR (100 MHz, DMSO- $d_6$ ):  $\delta$  182.0 (C=S), 164.9 (C=O), 137.1, 131.1, 129.9, 129.5; IR (ATR)  $\nu$  3649, 3434, 3163, 1664, 1605, 1591, 1460, 1241, 1073, 1008  $\text{cm}^{-1}$ .

#### General procedure for the synthesis of 2-amino-1,3,4-thiadiazole derivatives (2)

2-Benzoylhydrazinecarbothioamide **6** (0.05 mol) was dissolved in concentrated H<sub>2</sub>SO<sub>4</sub> (50 mL) and agitated at room temperature till next day. Then the mixture was alkalized with 25% ammonia and the precipitated product was filtered off, dried on air and recrystallized from the mixture of EtOH:H<sub>2</sub>O yielding the corresponding 2-amino-1,3,4-thiadiazole **2**.

#### *2-Amino-5-(4-tert-buthylphenyl)-1,3,4-thiadiazole (2a)*

The product was obtained as a white solid (41% yield, 4.78 g, 0.020 mol); mp 251-253 °C;  $R_f$  (MeOH:CHCl<sub>3</sub>, 1:4 v/v) 0.54.  $^1\text{H}$  NMR (400 MHz, DMSO- $d_6$ ):  $\delta$  7.67 (d, 2H,  $J=8.4$  Hz, Ar: H-2, H-6), 7.48 (d, 2H,  $J=8.4$  Hz, Ar: H-3, H-5), 7.35 (s, 2H, NH<sub>2</sub>), 1.29 (s, 9H, C(CH<sub>3</sub>)<sub>3</sub>);  $^{13}\text{C}$  NMR (100 MHz, DMSO- $d_6$ ):  $\delta$  168.1, 156.3, 152.2, 128.3, 126.0, 125.8, 34.5, 30.8; IR (ATR)  $\nu$ : 3269, 3095, 2959, 1632, 1566, 1511, 1472, 1363, 1266, 1135, 1110, 1056, 985, 832, 730  $\text{cm}^{-1}$ ; HRMS  $m/z$  calcd for (C<sub>12</sub>H<sub>15</sub>N<sub>3</sub>S + H<sup>+</sup>): 234.1059; found: 234.1063.

#### *2-Amino-5-phenyl-1,3,4-thiadiazole (2b)*

The product was obtained as a white solid (45% yield, 3.99 g, 0.023 mol); mp 232-233 °C (lit.: 230 °C [27]);  $R_f$  (MeOH:CHCl<sub>3</sub>, 1:4 v/v) 0.56. <sup>1</sup>H NMR (400 MHz, DMSO-*d*<sub>6</sub>): δ 7.61 (d, 2H, *J*=8.0 Hz, Ar: H-2, H-6), 7.41-7.75 (m, 5H, Ar: H-3, H-4, H-5, NH<sub>2</sub>); <sup>13</sup>C NMR (100MHz, DMSO-*d*<sub>6</sub>): δ 168.5, 156.3, 130.9, 129.5, 129.1, 126.3; IR (ATR) ν 3253, 3062, 2954, 1630, 1510, 1467, 1336, 1264, 1131, 1058, 1002, 980, 759 cm<sup>-1</sup>.

*2-Amino-5-(4-fluorophenyl)-1,3,4-thiadiazole (2c)*

The product was obtained as a white solid (61% yield, 5.95 g, 0.030 mol); mp 229-231 °C (lit.: 229-231 °C [28]);  $R_f$  (MeOH:CHCl<sub>3</sub>, 1:4 v/v) 0.58. <sup>1</sup>H NMR (400 MHz, DMSO-*d*<sub>6</sub>): δ 7.67 (d, 2H, *J*=8.4 Hz, Ar: H-2, H-6), 7.38 (s, 2H, NH<sub>2</sub>), 7.30 (d, 2H, *J*=8.4 Hz, Ar: H-3, H-5); <sup>13</sup>C NMR (100 MHz, DMSO-*d*<sub>6</sub>): δ 169.9, 164.2, 156.1, 129.3, 128.1, 116.2; IR (ATR) ν 3388, 3279, 3112, 1673, 1628, 1593, 1497, 1336, 1311, 1270, 1220, 1105, 1060, 840, 773 cm<sup>-1</sup>.

*2-Amino-5-(4-chlorophenyl)-1,3,4-thiadiazole (2d)*

The product was obtained as a white solid (65% yield, 6.88 g, 0.033 mol); mp 227-229 °C (lit.: 227 °C [29]);  $R_f$  (MeOH:CHCl<sub>3</sub>, 1:4 v/v) 0.60. <sup>1</sup>H NMR (400 MHz, DMSO-*d*<sub>6</sub>): δ 7.71 (d, 2H, *J*=8.0 Hz, Ar: H-2, H-6); 7.58 (d, 2H, *J*=8.0 Hz, Ar: H-3, H-5), 7.48 (br s, 2H, NH<sub>2</sub>); <sup>13</sup>C NMR (100 MHz, DMSO-*d*<sub>6</sub>): δ 168.8, 155.1, 136.1, 132.0, 129.5, 128.7; IR (ATR) ν 3249, 3068, 2962, 1635, 1590, 1507, 1463, 1320, 1262, 1136, 1069, 1014, 980, 824, 772 cm<sup>-1</sup>.

# NMR Spectra

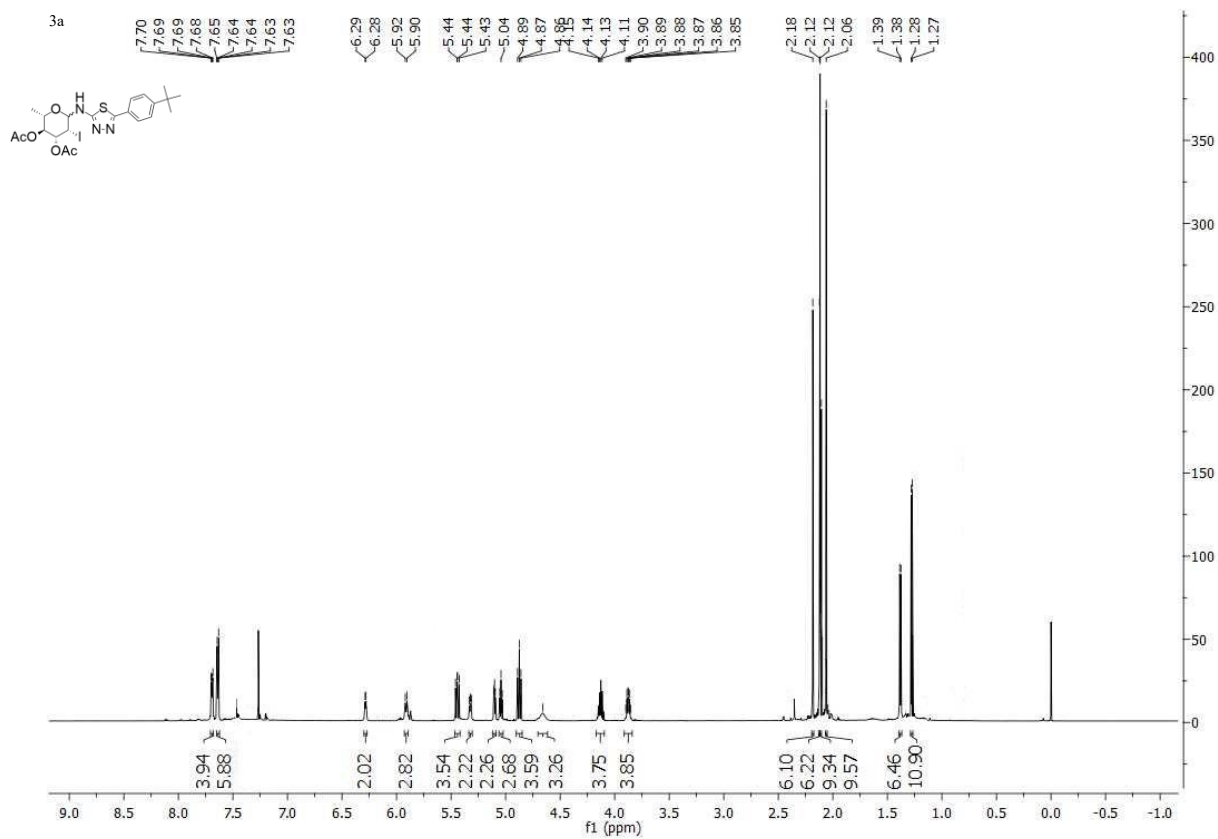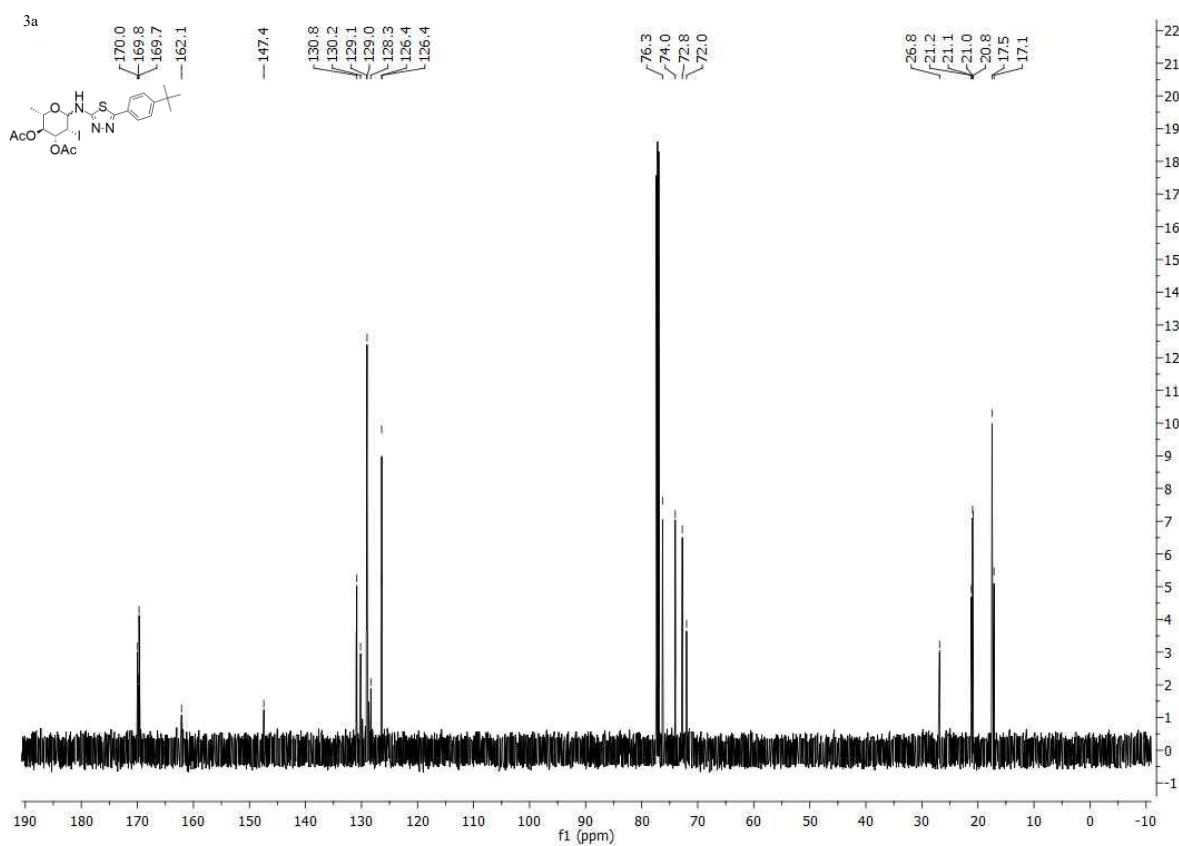

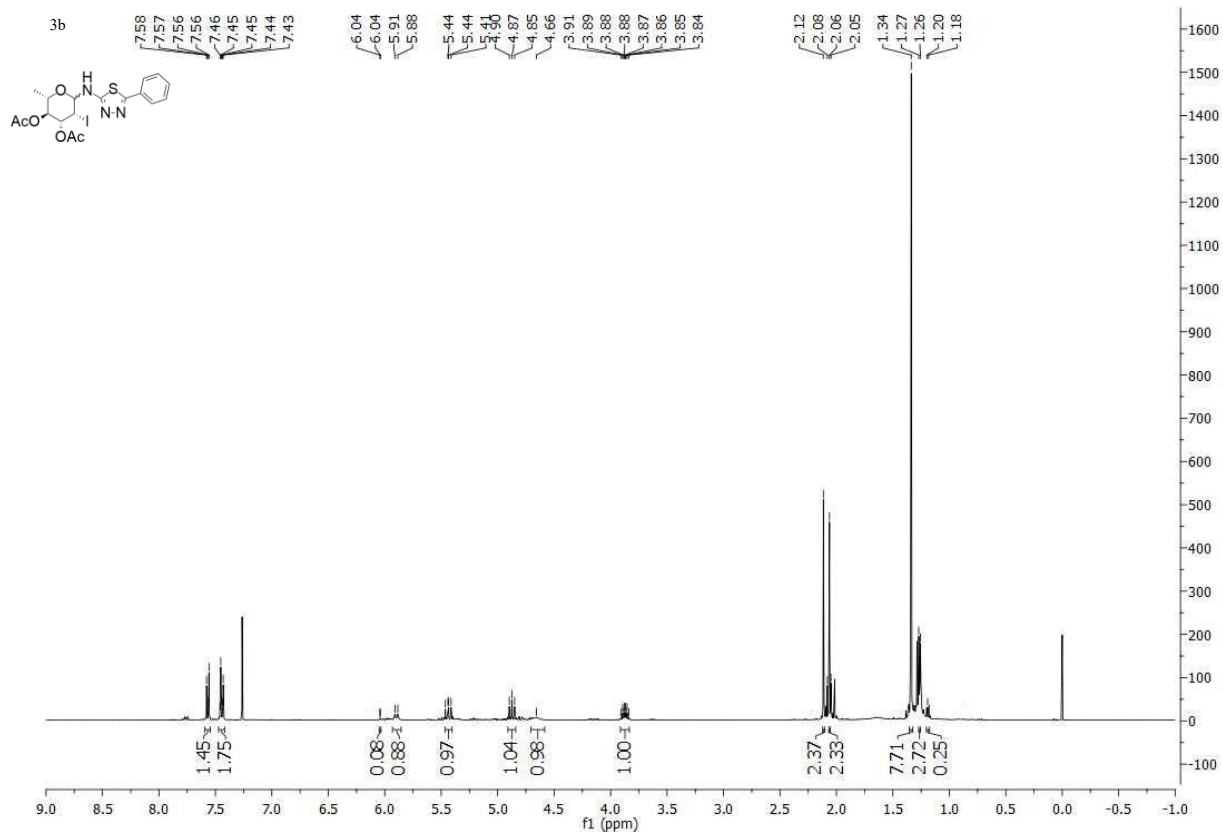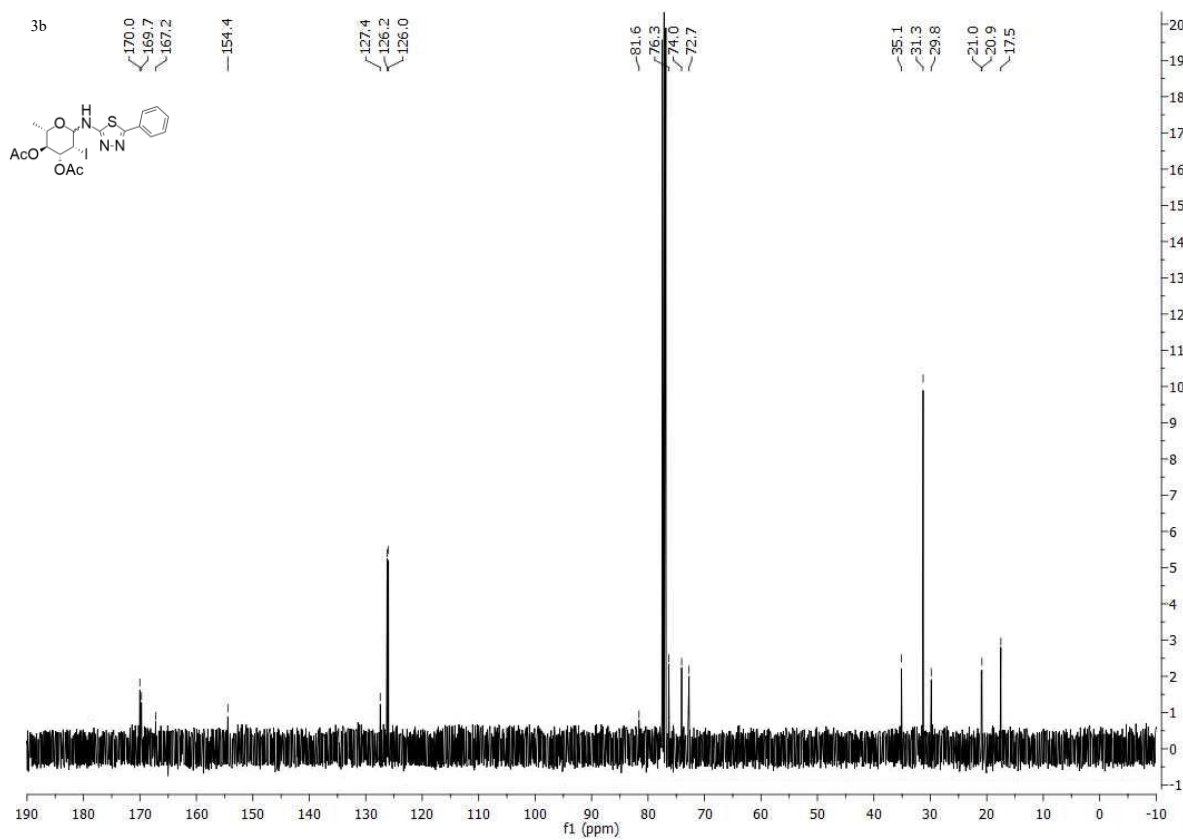

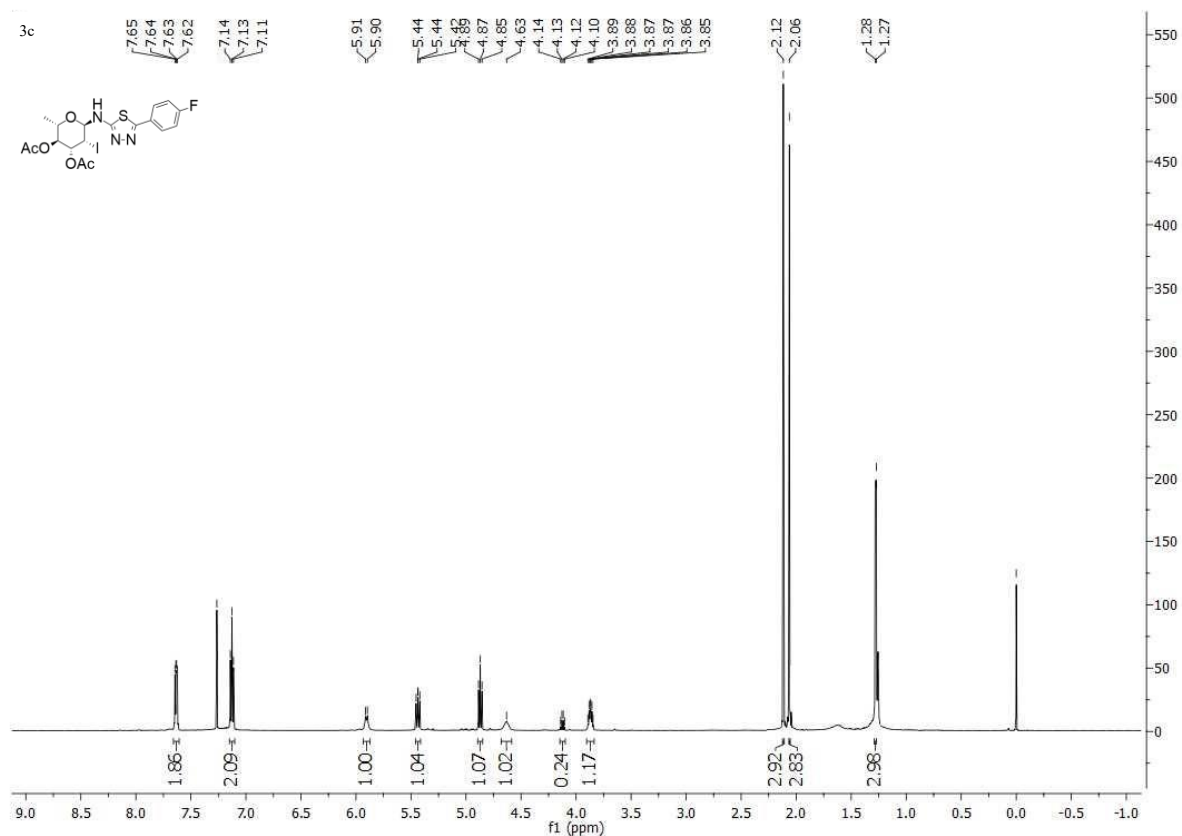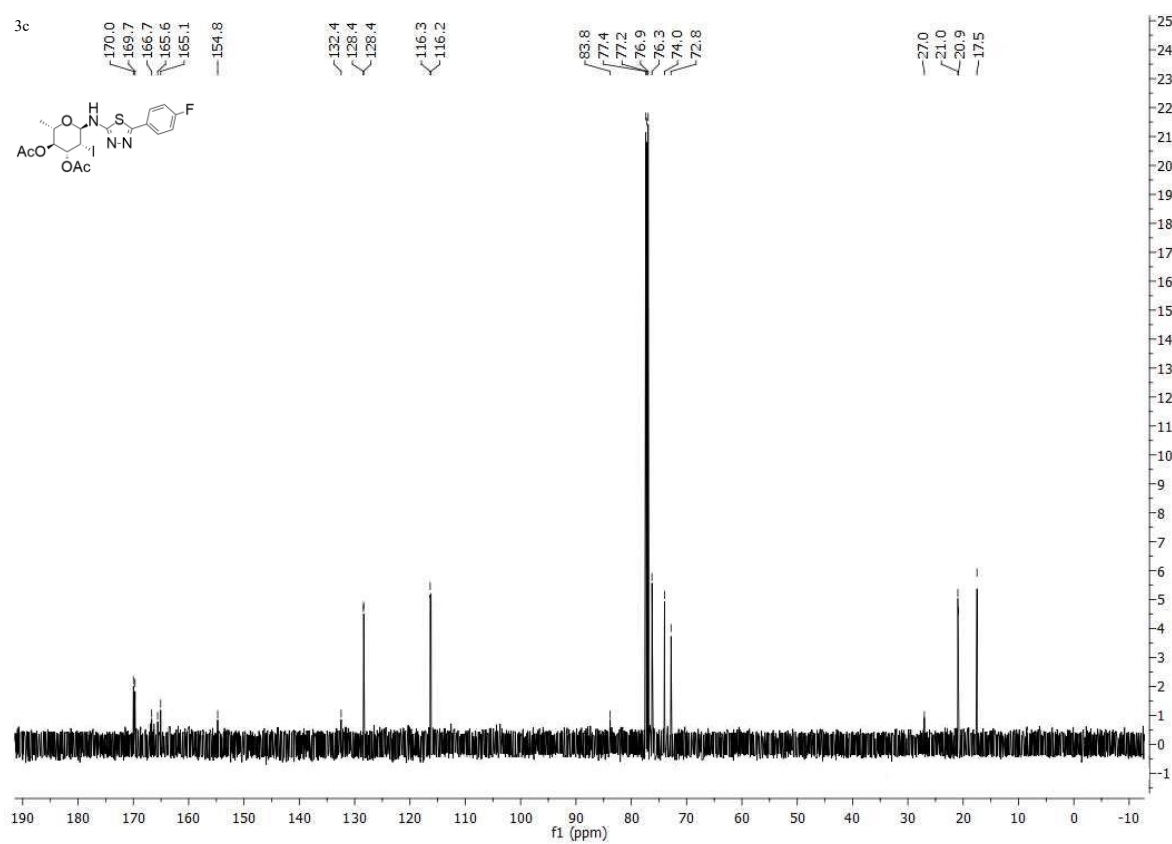

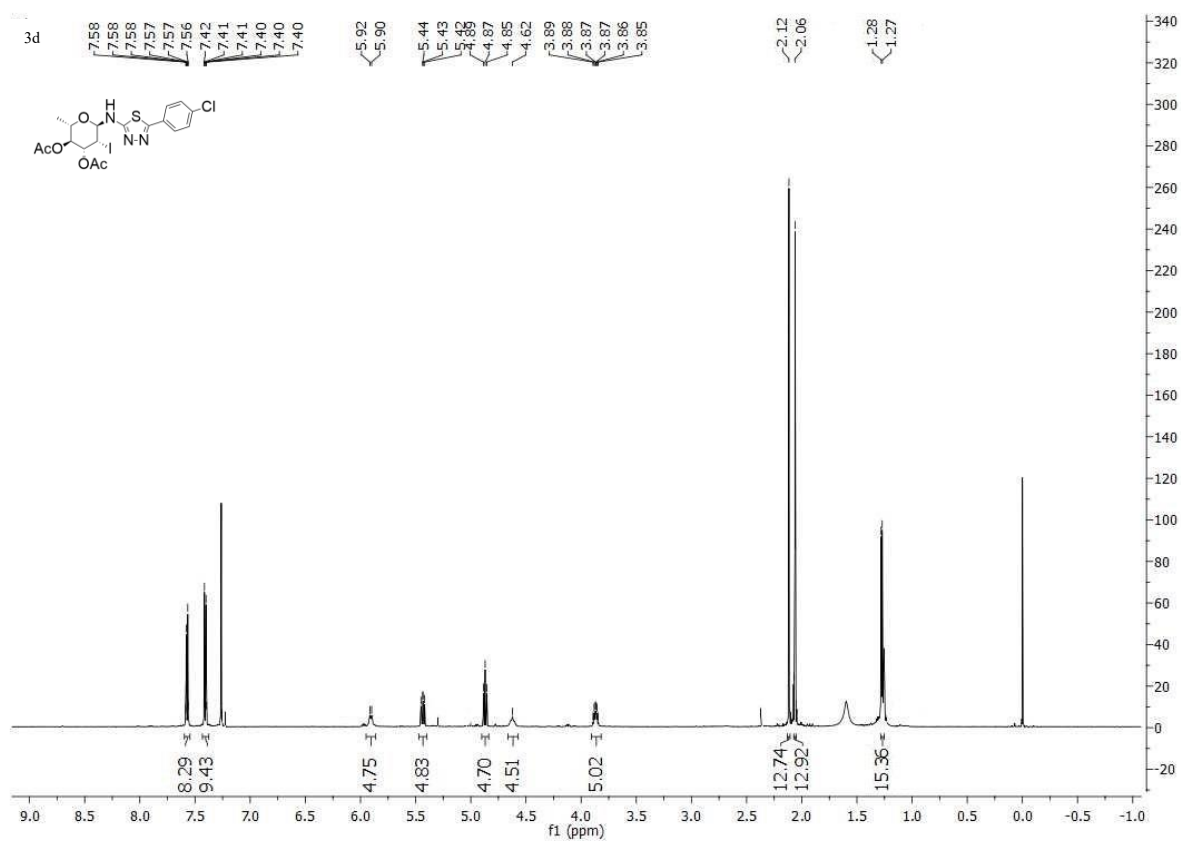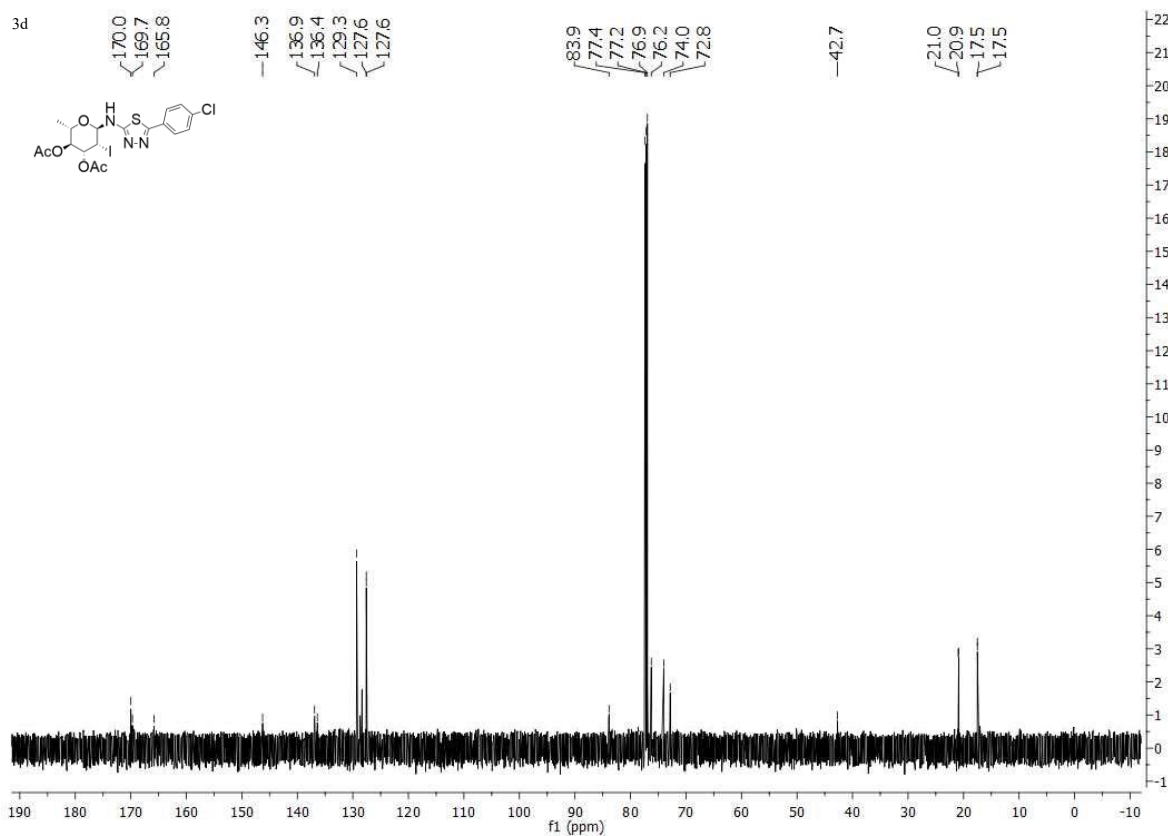



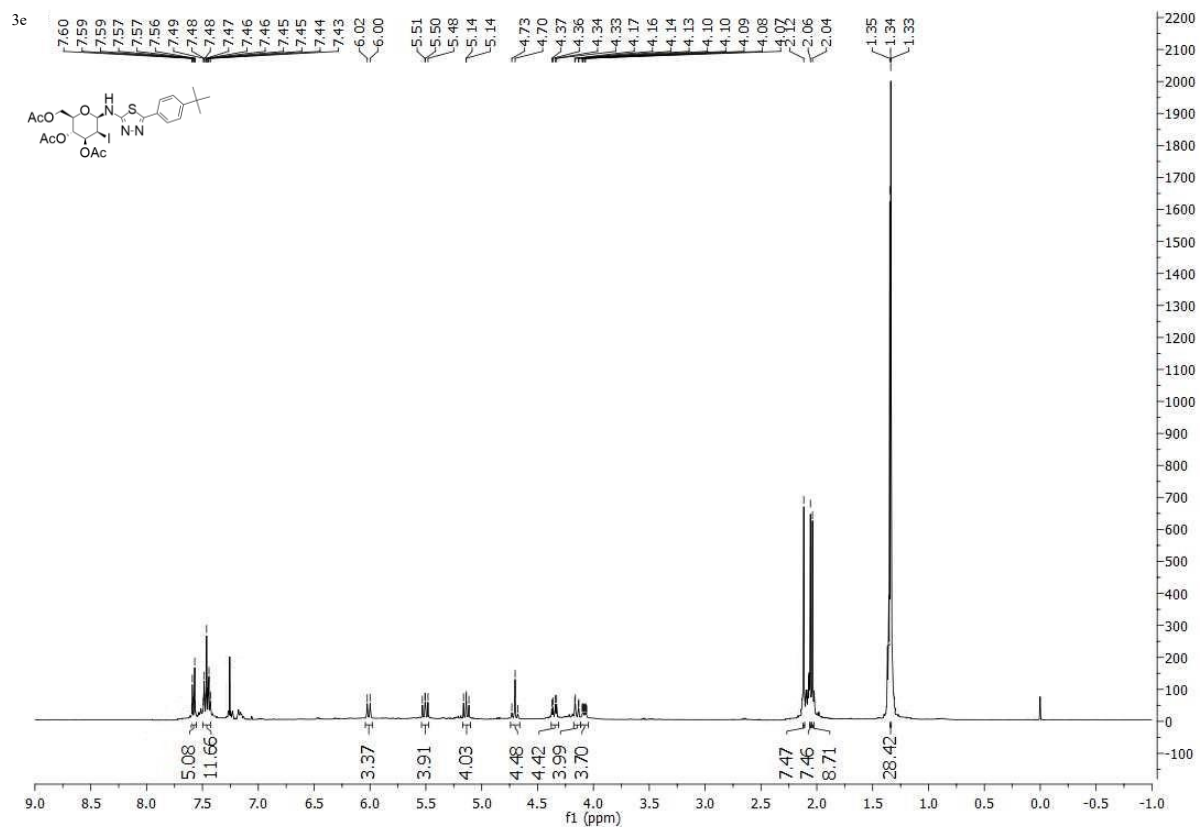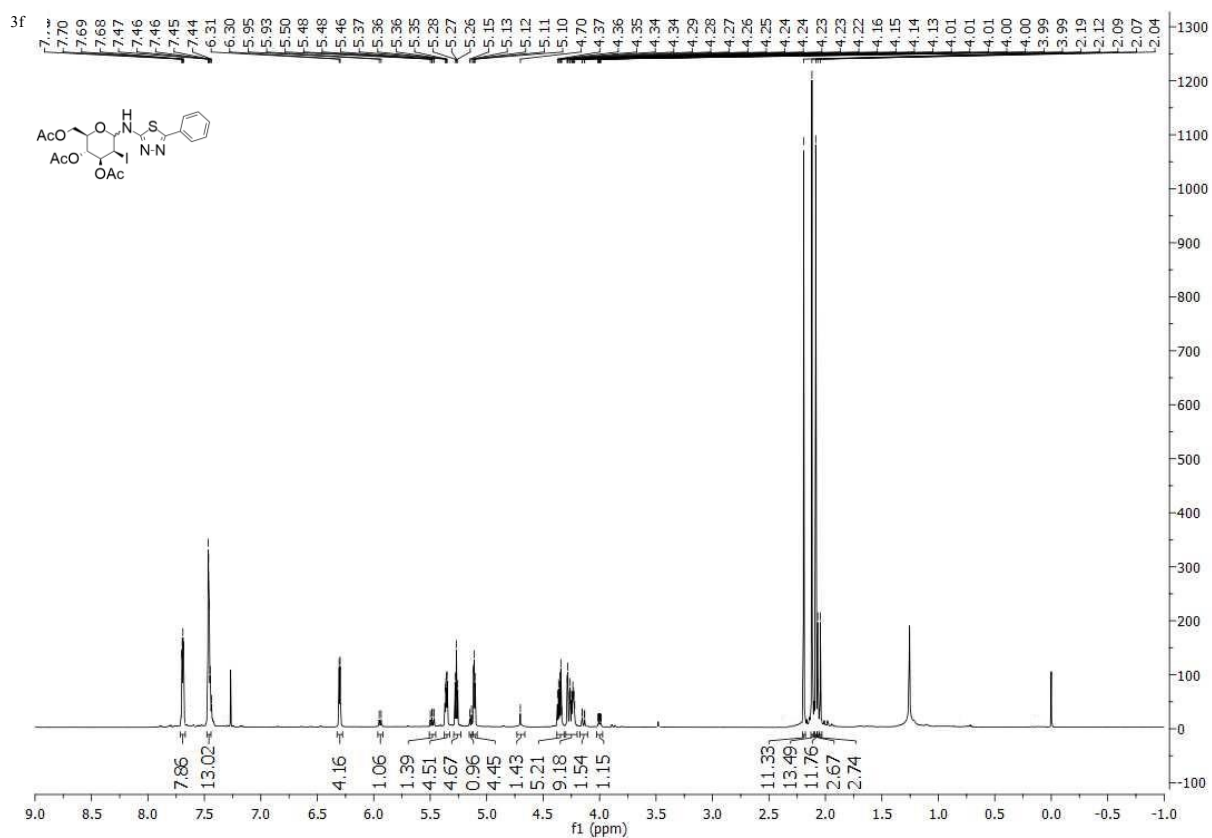

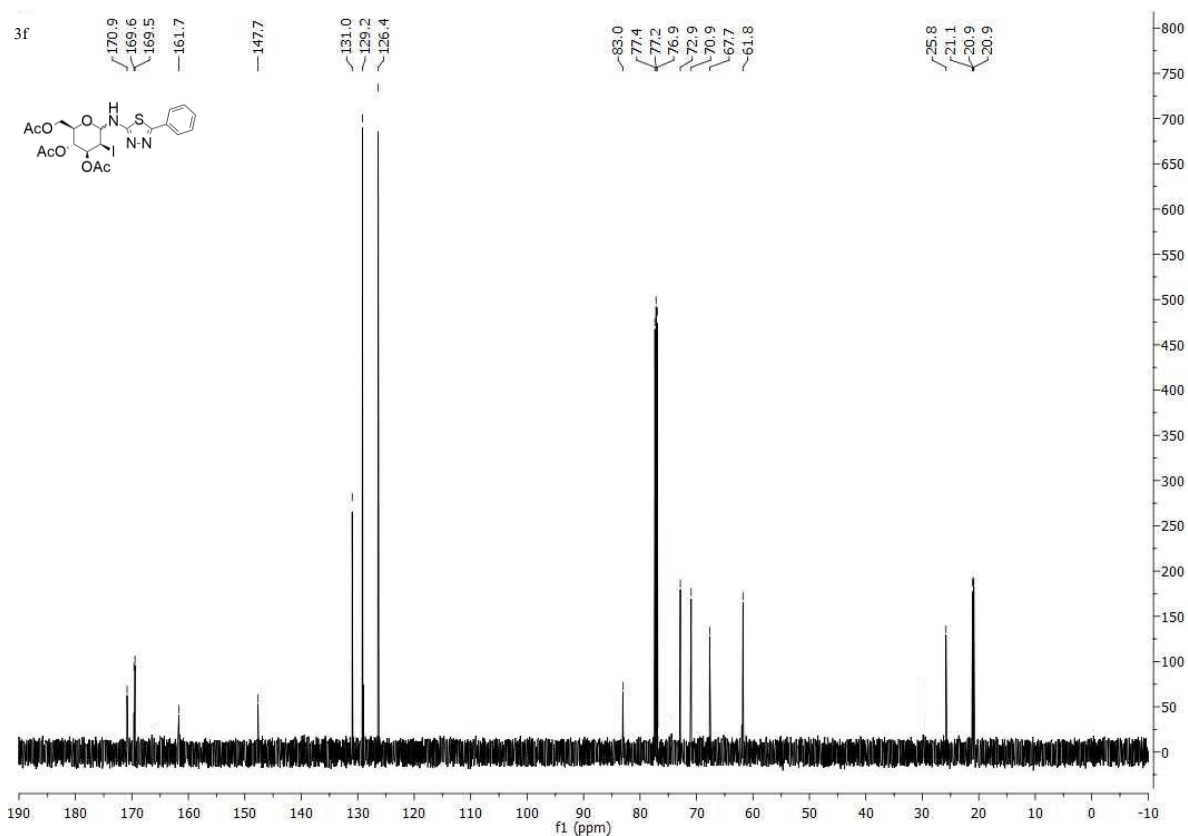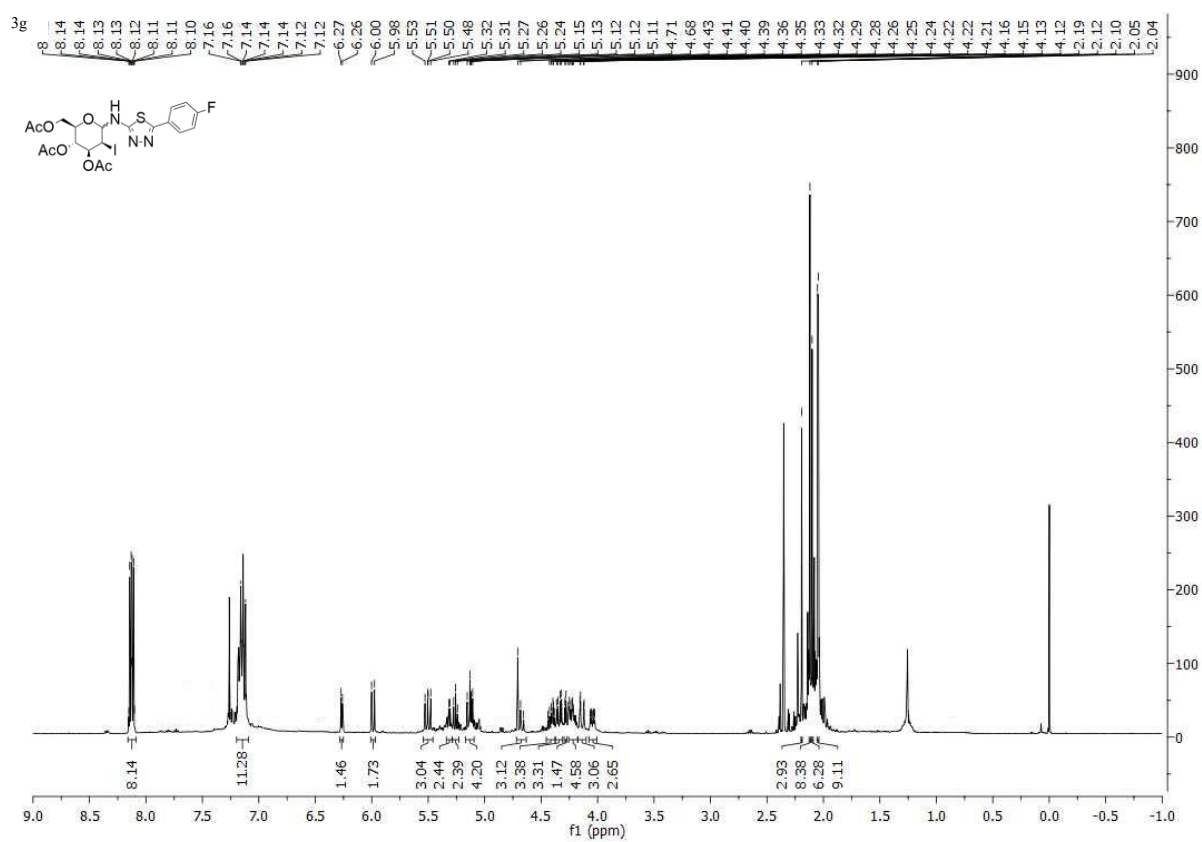

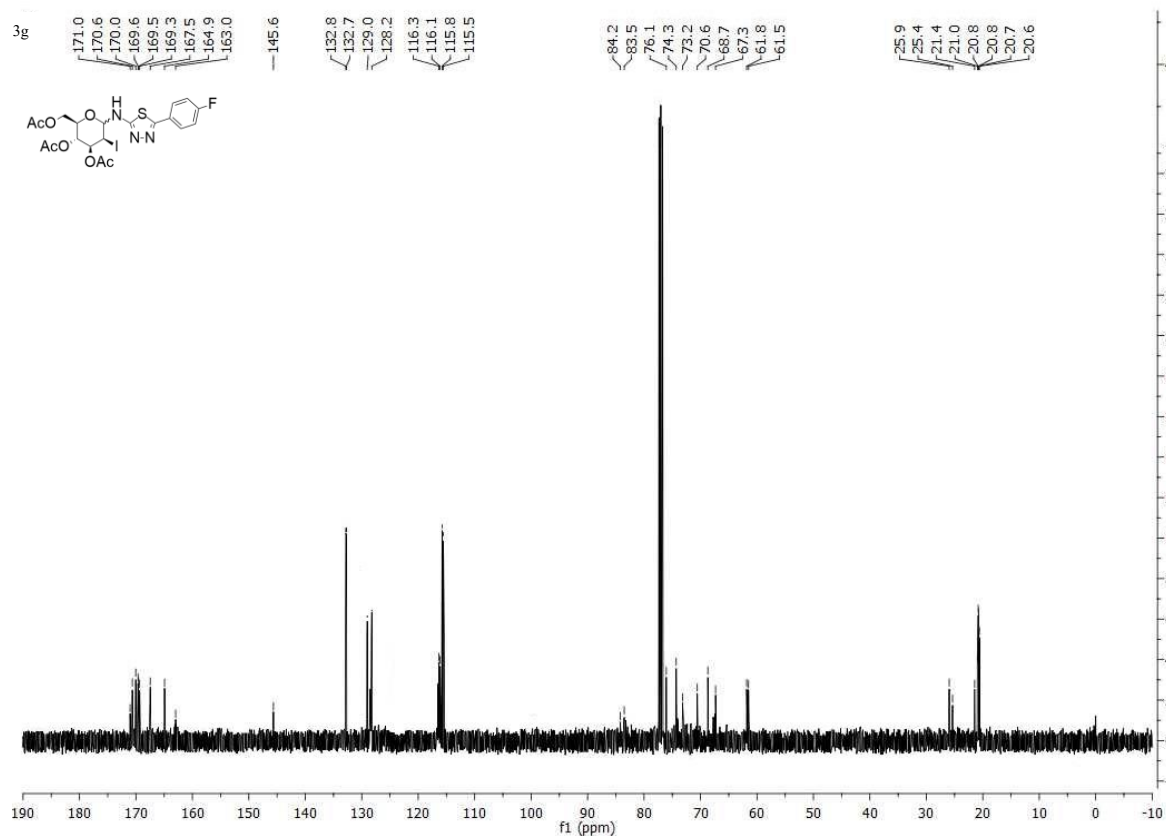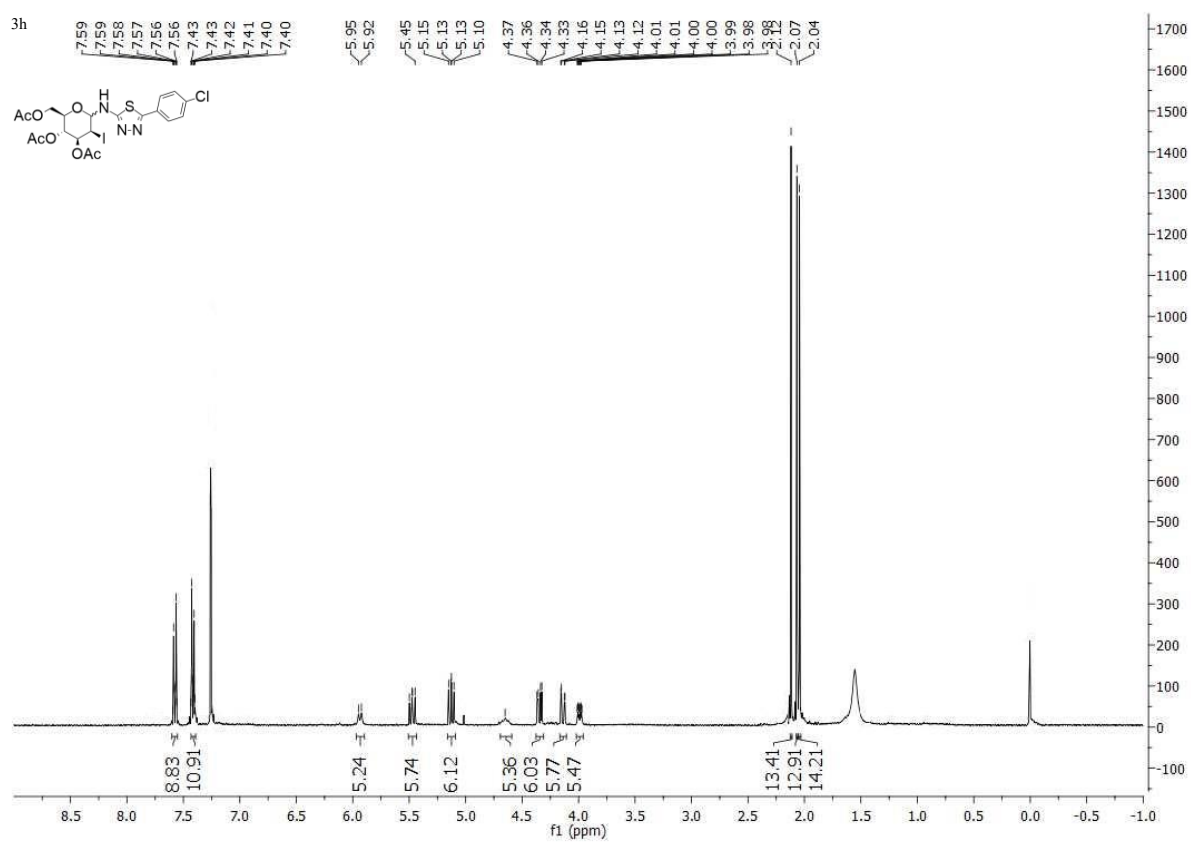

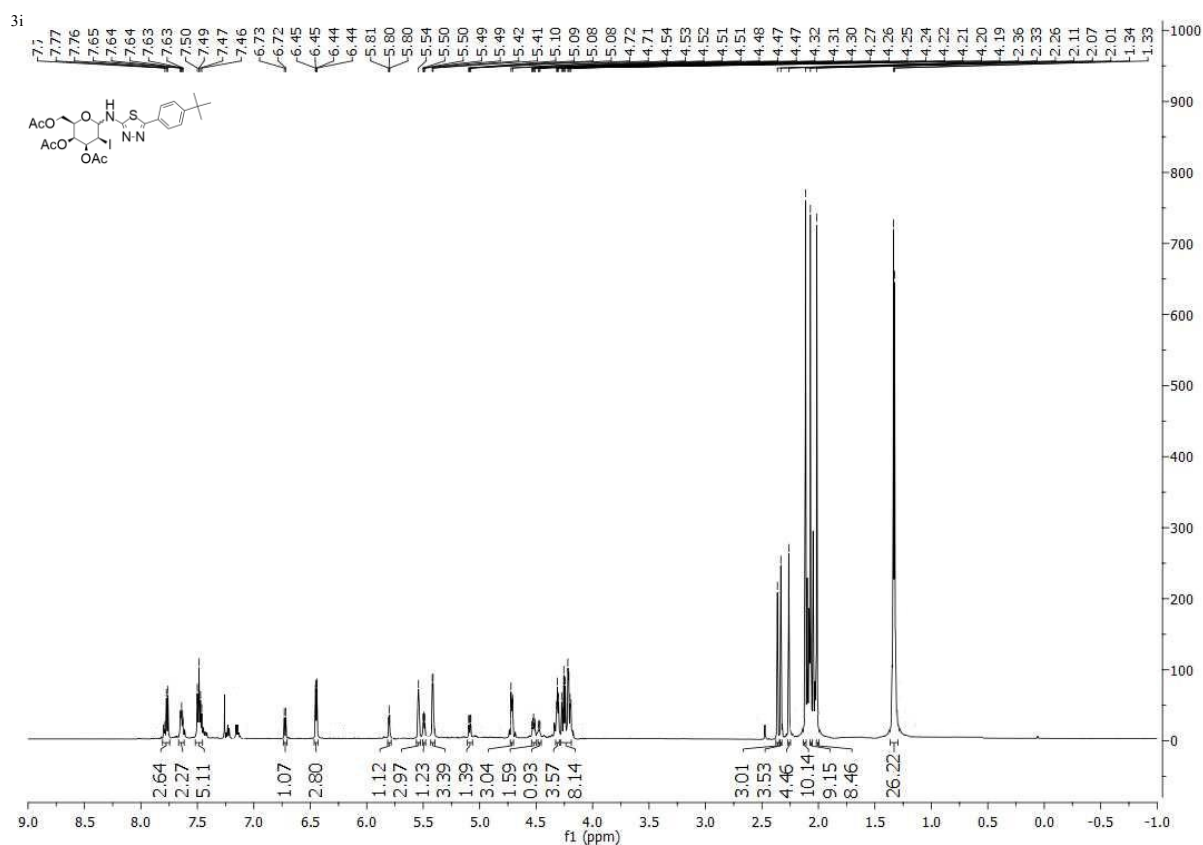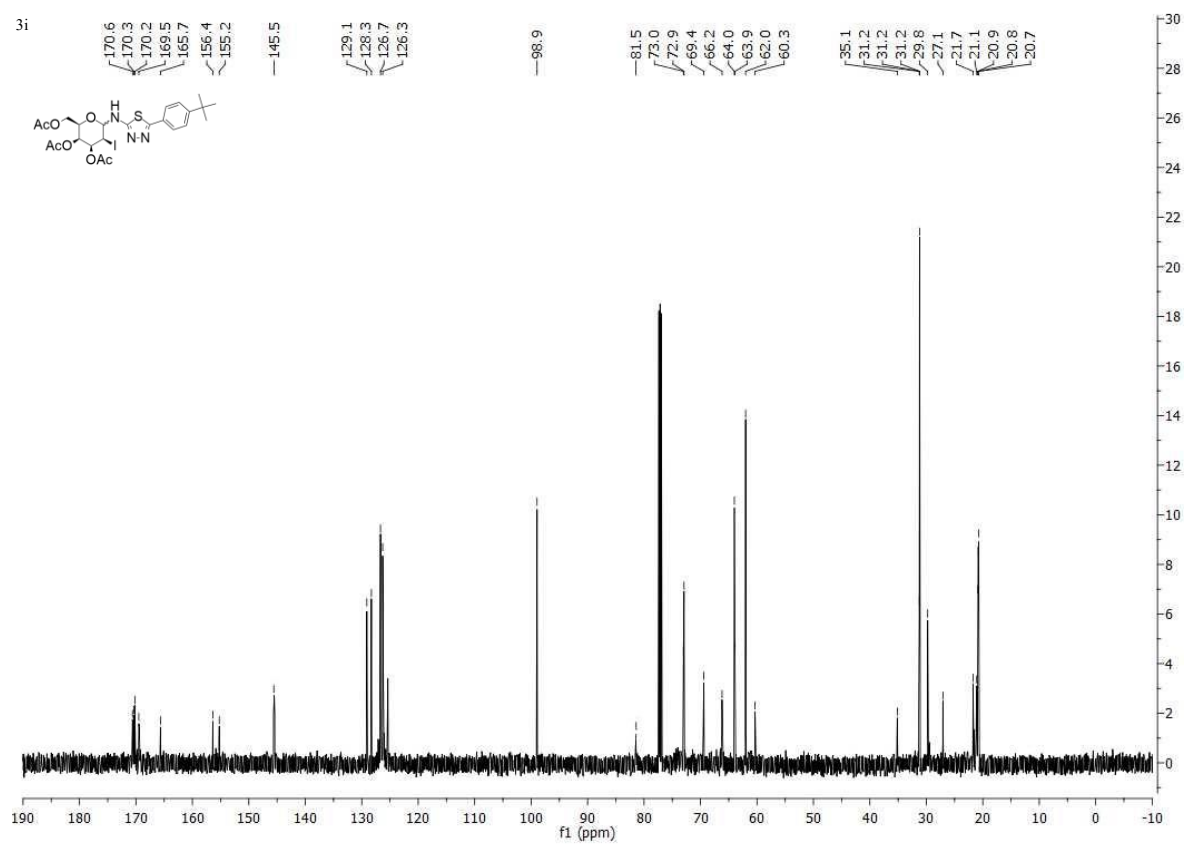

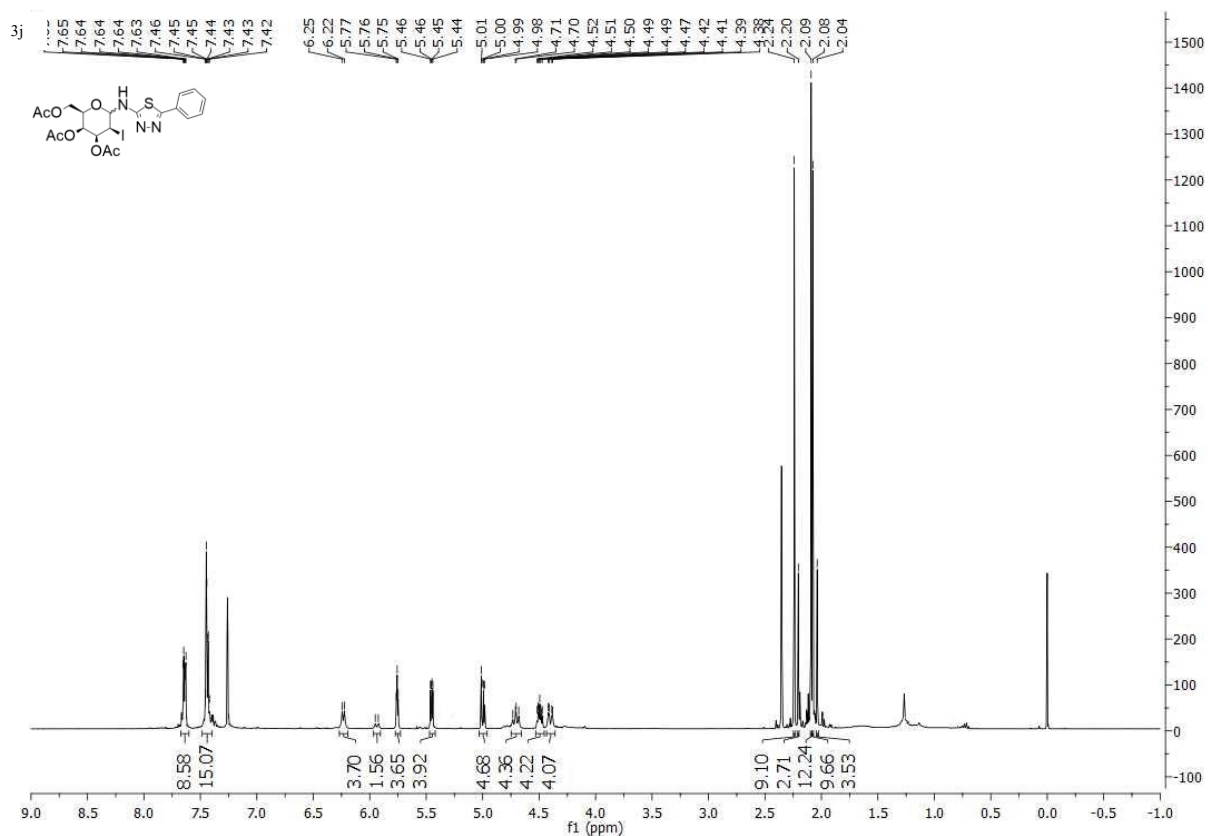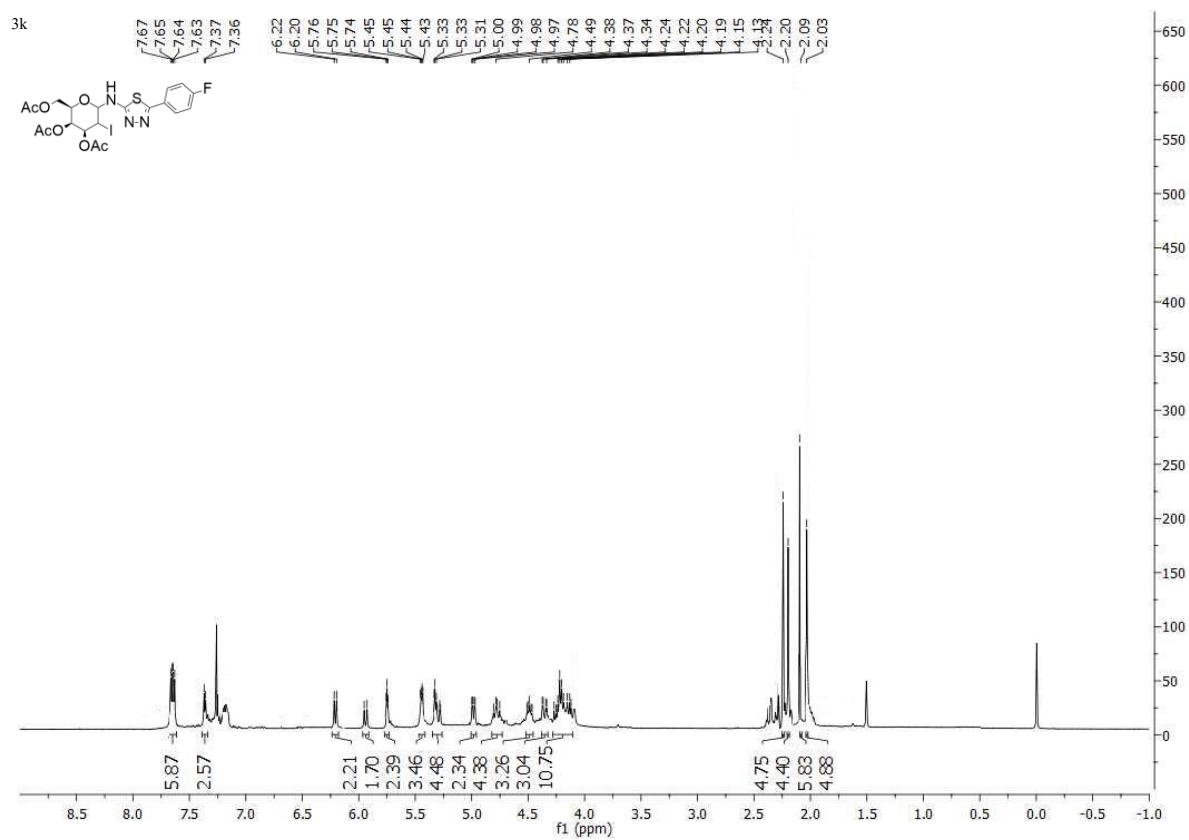

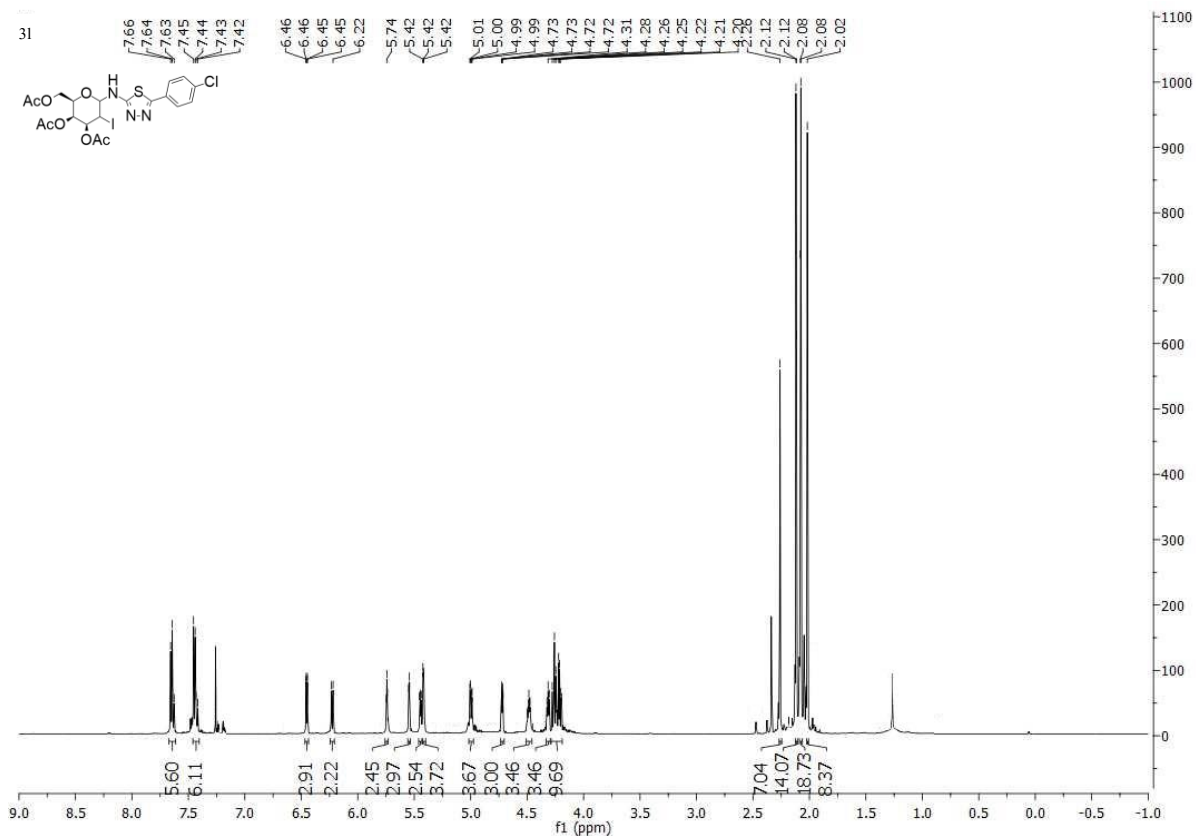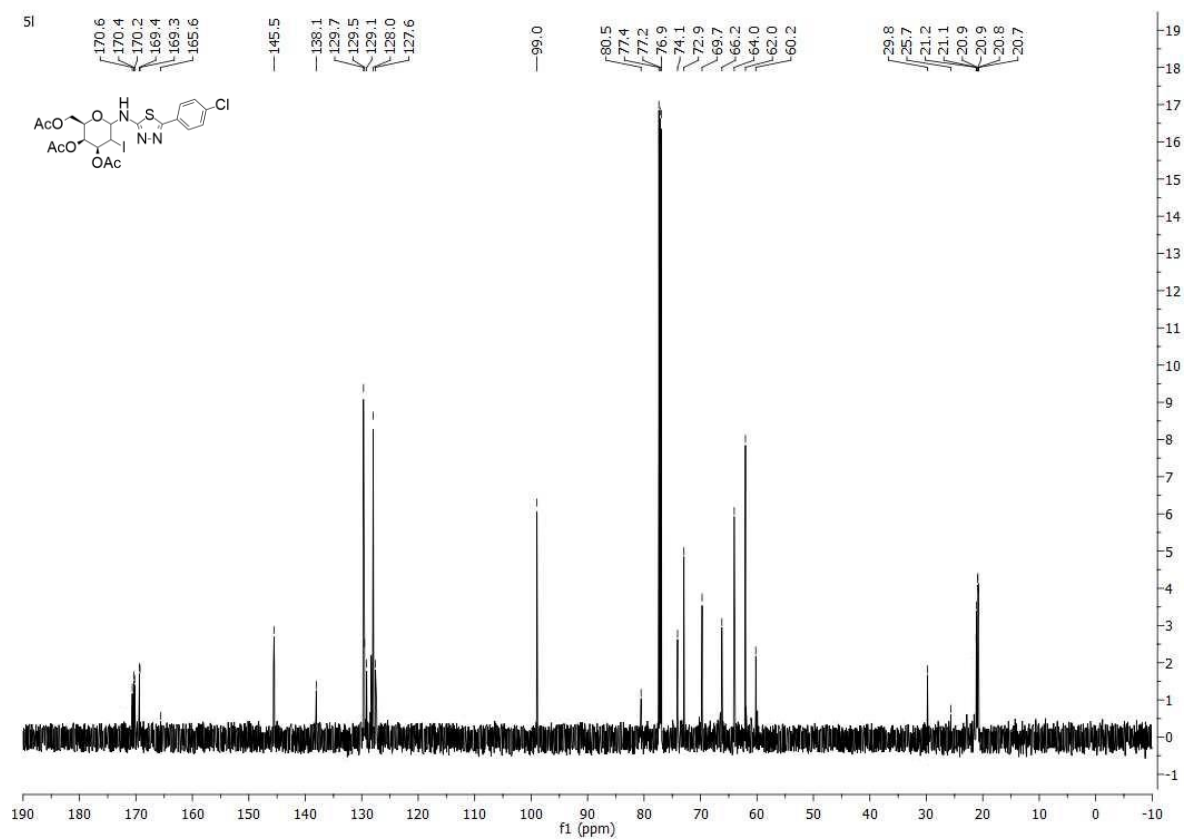

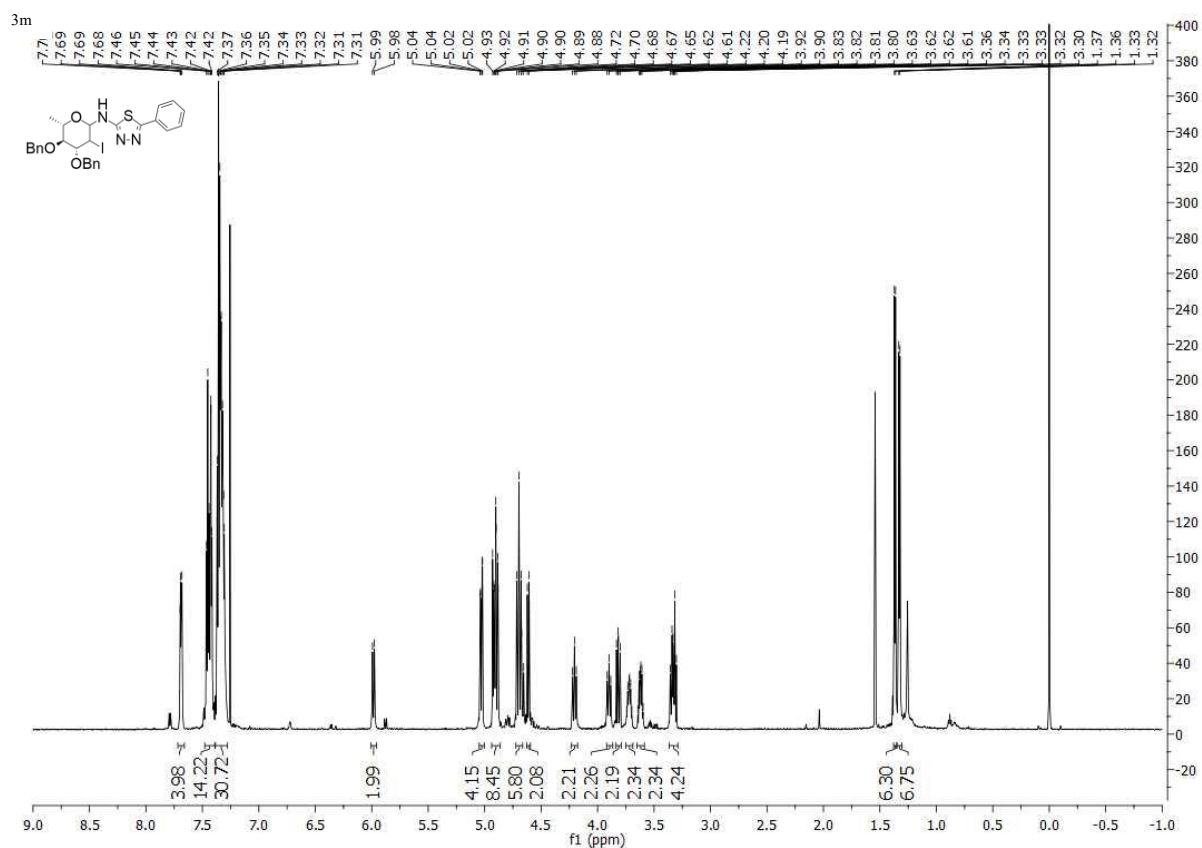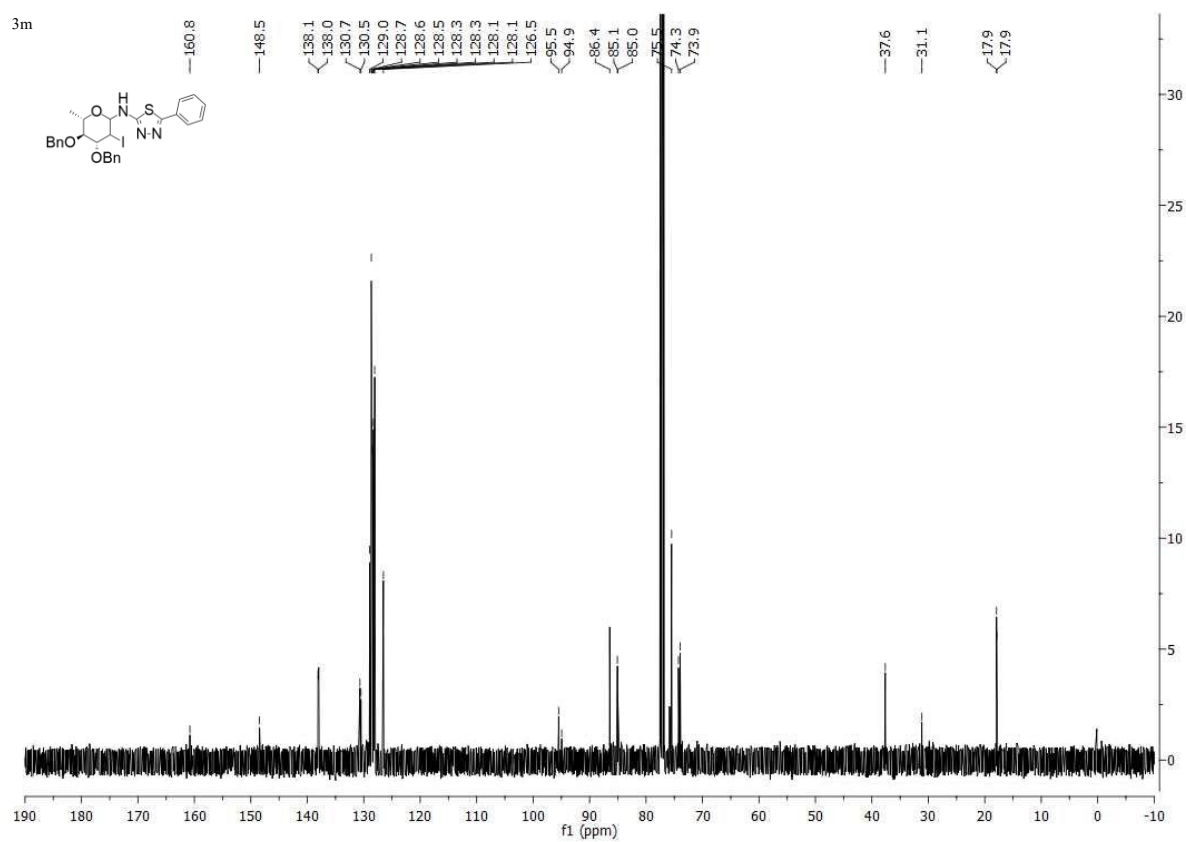

**Figure 1.** Typical histograms of PI stained DNA content during the cell cycle of MCF-7, HCT116, and HeLa cells, after 72 h of incubation with compounds at a dose of 100  $\mu$ M. The statistical analysis was based on a t-test and a p-value less than 0.05 was considered statistically significant in comparison to the untreated controls (bolded and colored).

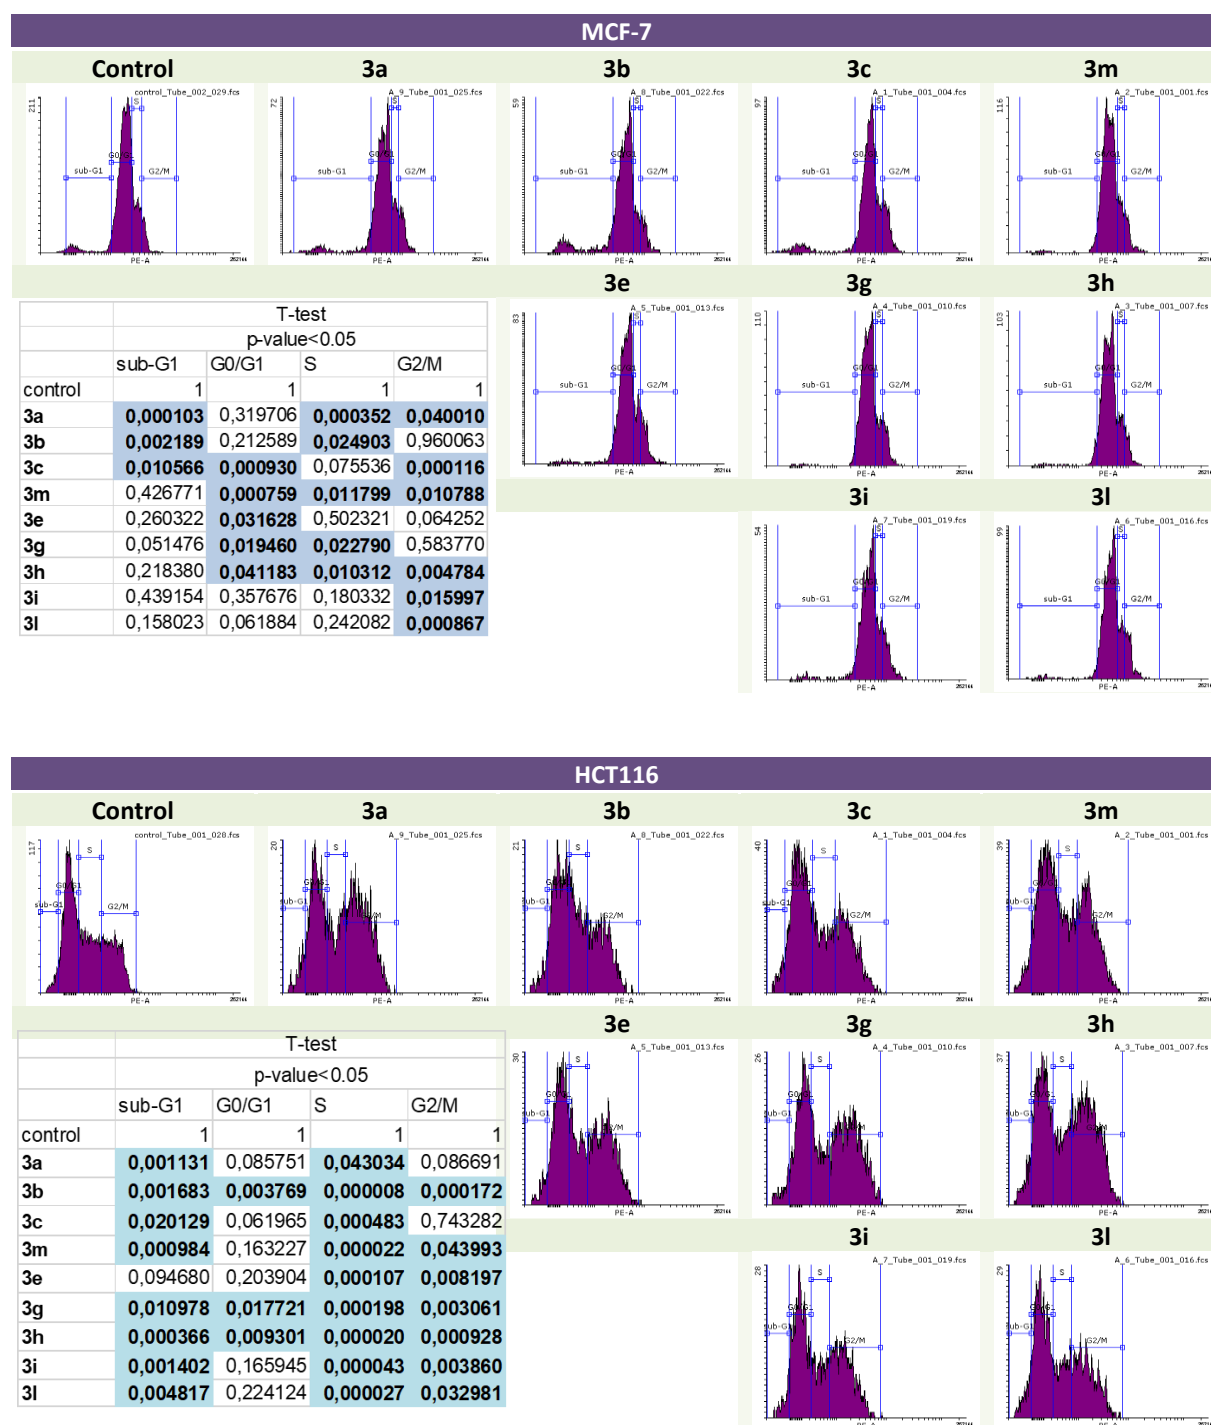



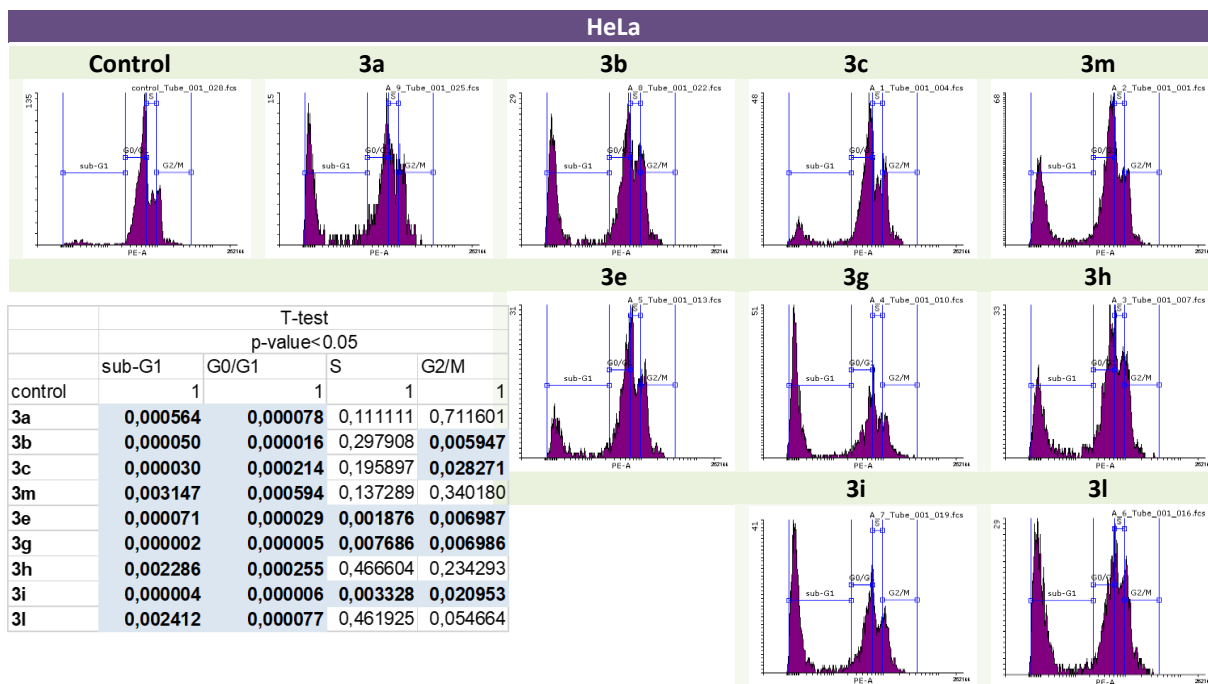

**Figure 2.** Typical dot plots of normal (Annexin-V negative and PI negative stained); early apoptotic (Annexin-V positive and PI negative stained); late apoptotic (Annexin-V positive and PI-positive stained); and necrotic (Annexin-V negative and PI-positive stained) MCF-7, HCT116, and HeLa cells after 72 h of incubation with compounds at a dose of 100  $\mu$ M. The statistical analysis was based on a t-test and a p-value less than 0.05 was considered statistically significant in comparison to the untreated controls (bolded and colored).

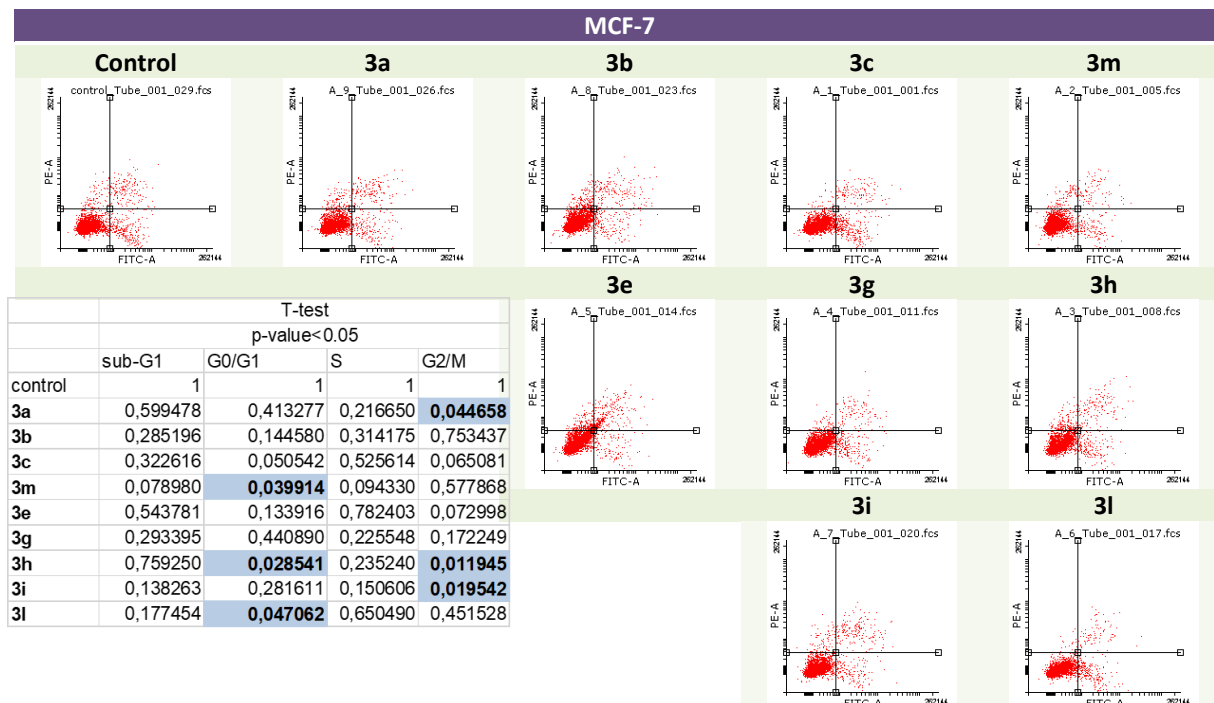

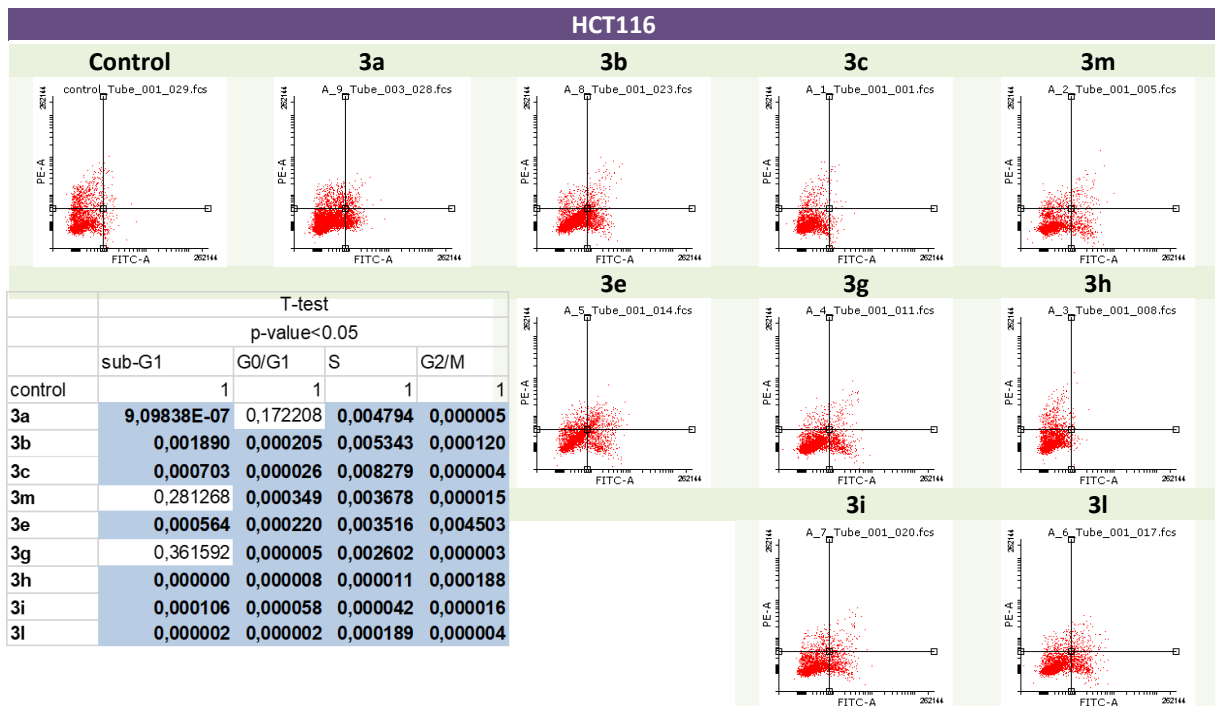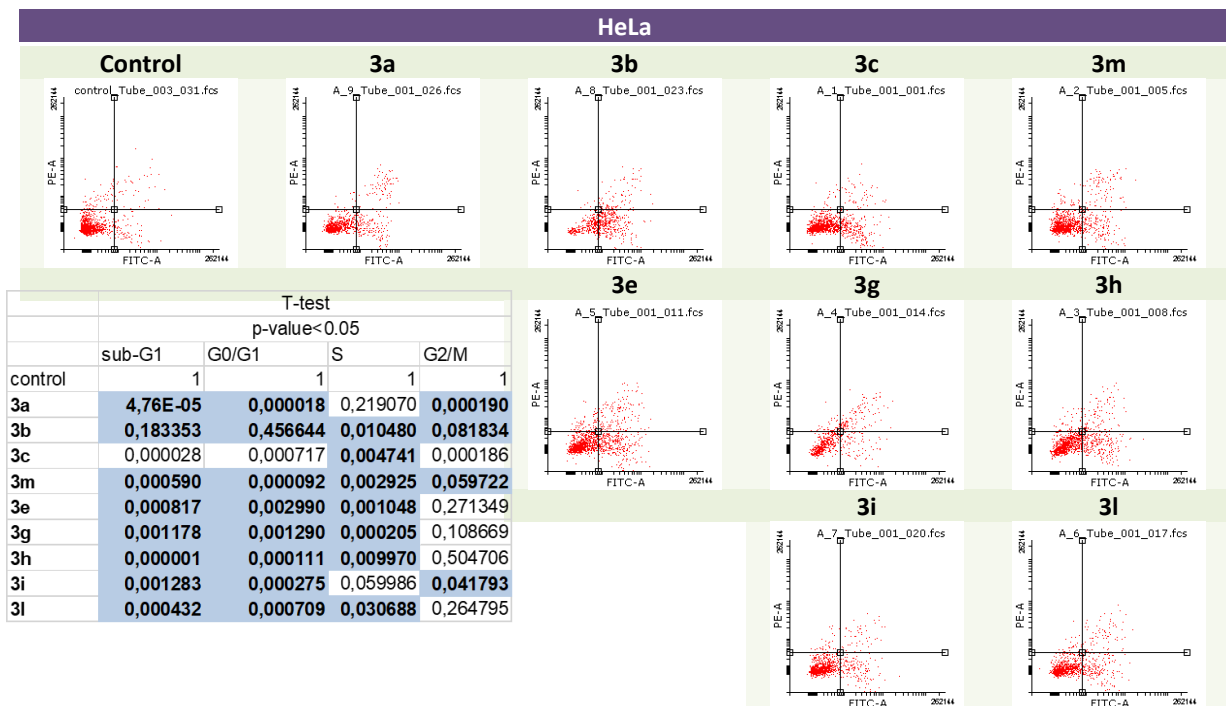

Supplement: s1 [file s1]
